# Supplementary material for: Balanced translocation linked to psychiatric disorder, glutamate, and cortical structure/function
Source: PubMed Central journal article supplement (PMC4994153; doi:10.1038/npjschz.2016.24), 2016-08-10
Supplement: npjschz201624-s3.pdf [file npjschz201624-s3.pdf]

Supplementary Dataset 1, 1a, 1b and 1c files have been removed as they contain patient confidential information.
